# Supplementary material for: Highly selective amino-functionalized magnetic molecularly imprinted polymers: absorbents for dispersive solid phase extraction and trace level analysis of chlorophenols in seawater
Source: Royal Society of Chemistry journal article supplement (doi:10.1039/c6ra16413g), 2016-01-01
Supplement: c6ra16413g1.pdf [file c6ra16413g1.pdf]

## Supplementary Information (SI)

# Highly selective amino-functionalized magnetic molecularly imprinted polymers: absorbents for dispersive solid phase extraction and trace level analysis of chlorophenols in seawater

Haoyu Shen\*, Baiwei Liu, Qi Xiang, Chunchun Wang, Shi Qiang Mao

Ningbo Institute of Technology, Zhejiang University; Ningbo, 315100, China

### Figure Captions of Fig. S1~S3

**Fig. S1** TEM (a) and SEM(b) image of  $n\text{Fe}_3\text{O}_4@\text{TEPA-PCP-MIP}$

**Fig. S2** (a) XRD and (b) VSM of the as-prepared materials

**Fig. S3** Effect of adsorption time on the adsorption of CPs at 5.0  $\mu\text{g/L}$  (a) 2-CP, (b) 2,4-DCP (c) 2,4,6-TCP (d) 2,3,4,6-TeCP (e) PCP onto  $n\text{Fe}_3\text{O}_4@\text{NH}_2\text{MIP}$  and  $n\text{Fe}_3\text{O}_4@\text{NH}_2\text{NIP}$

**Table S1** Imprinting factors ( $\alpha$ ) of  $n\text{Fe}_3\text{O}_4@\text{NH}_2\text{MIP}$

---

\*Corresponding author. Tel.: 86-574-88130130, E-mail address: [hyshen@nit.zju.edu.cn](mailto:hyshen@nit.zju.edu.cn) (H. Y. Shen)

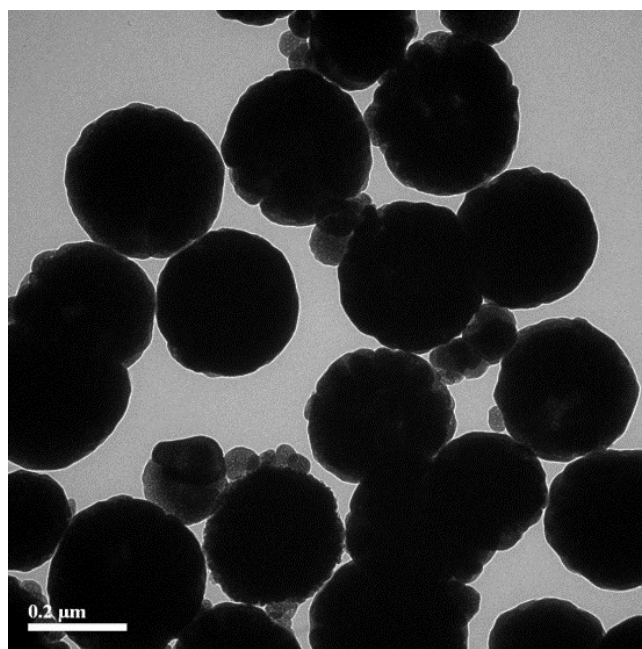

(a)

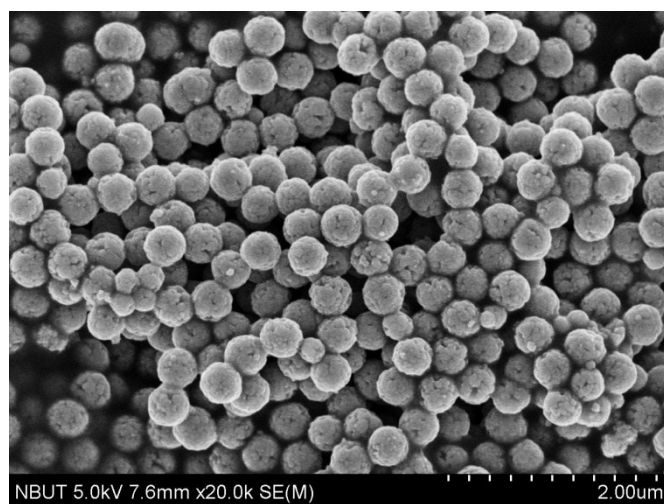

(b)

**Fig. S1** TEM (a) and SEM(b) image of  $n\text{Fe}_3\text{O}_4@\text{TEPA-PCP-MIP}$

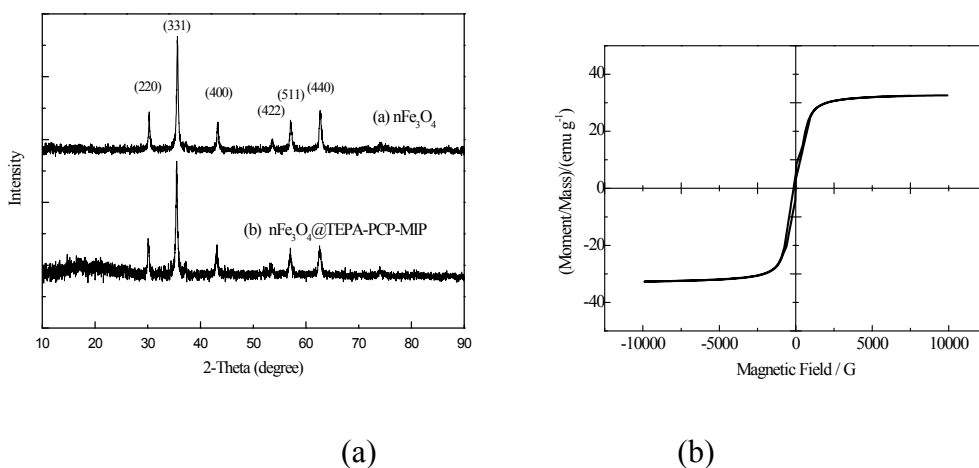

**Fig. 2** (a) XRD and (b) VSM of the as-prepared materials

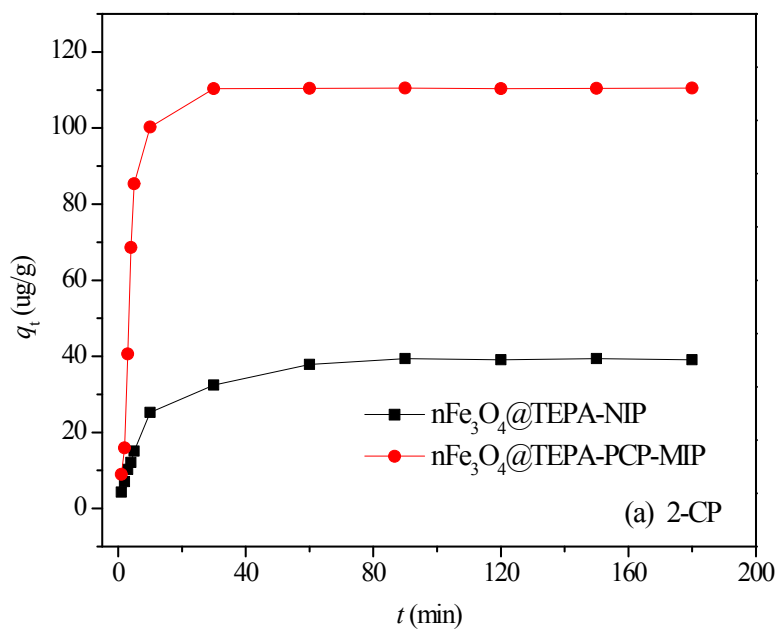

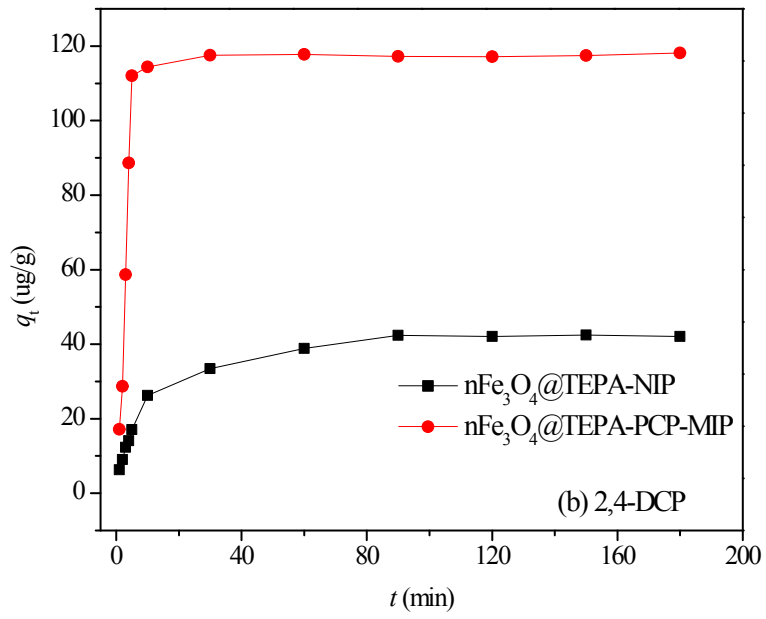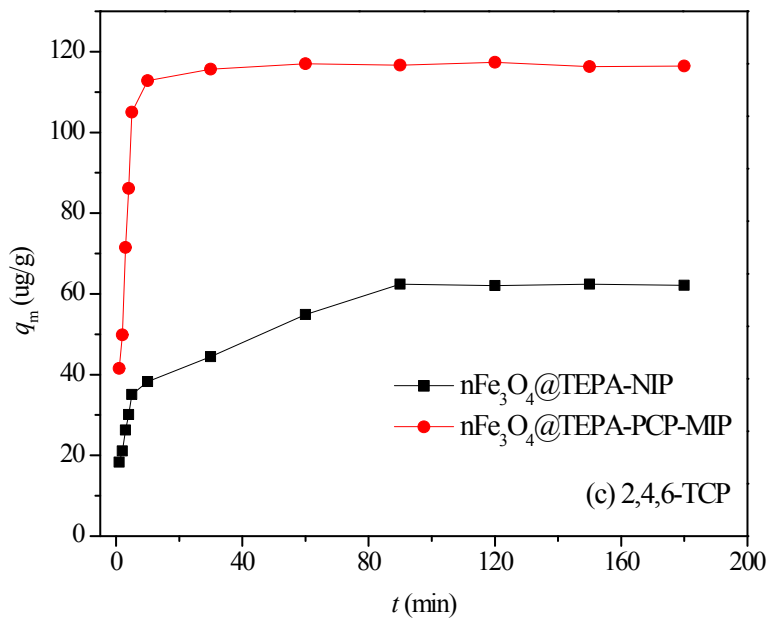

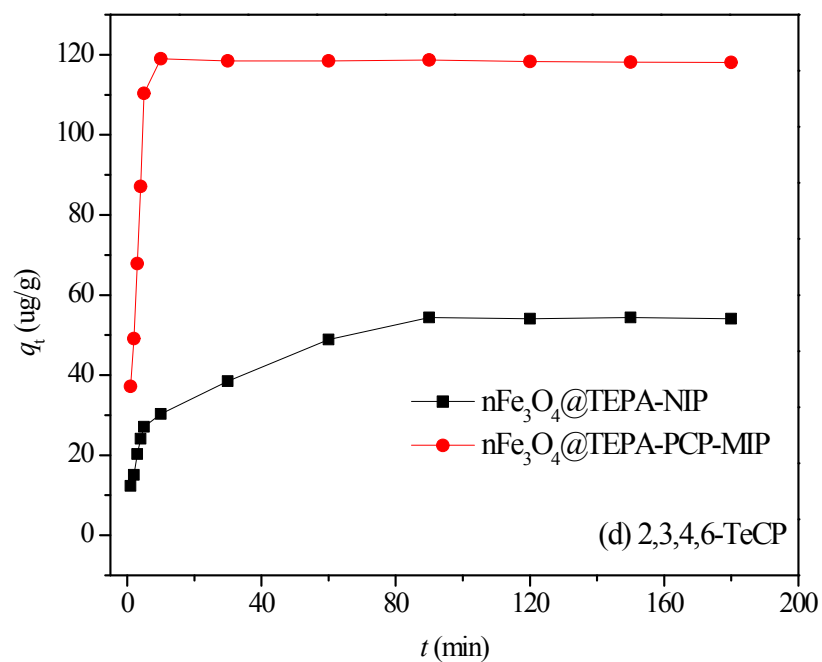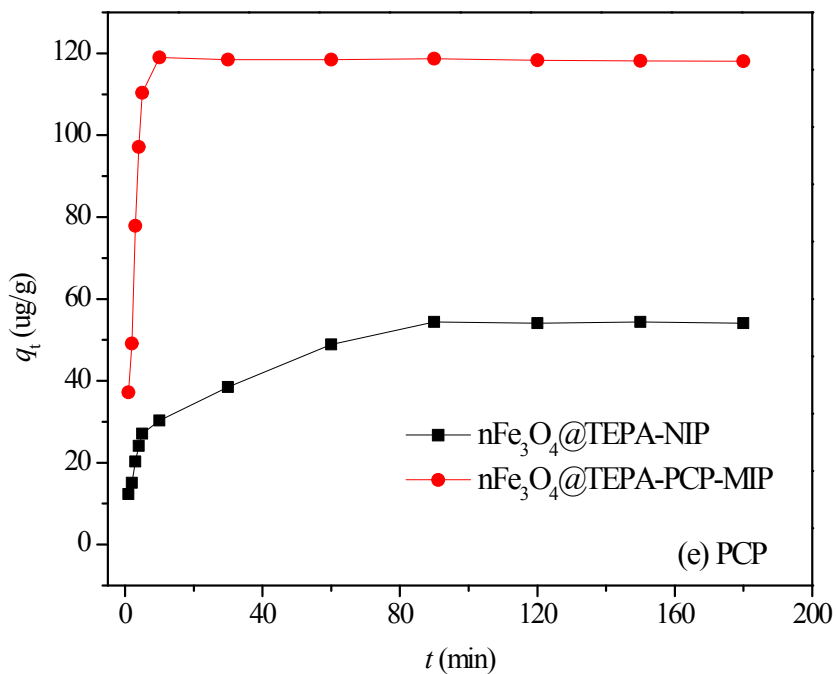

**Fig. S3** Effect of adsorption time on the adsorption of CPs at 5.0  $\mu\text{g/L}$  (a) 2-CP, (b) 2,4-DCP (c) 2,4,6-TCP (d) 2,3,4,6-TeCP (e) PCP onto  $\text{nFe}_3\text{O}_4@\text{NH}_2\text{MIP}$  and  $\text{nFe}_3\text{O}_4@\text{NH}_2\text{NIP}$

**Table S1** Imprinting factors ( $\alpha$ ) of  $n\text{Fe}_3\text{O}_4@\text{NH}_2\text{MIP}$ 

|                                                            | 2-CP  | 2,4-DCP | 2,4,6-TCP | 2,3,4,6-TeCP | PCP   |
|------------------------------------------------------------|-------|---------|-----------|--------------|-------|
| $q(n\text{Fe}_3\text{O}_4@\text{TEPA-PCP-MIP})$<br>(ug/g)  | 118.1 | 118.1   | 118.5     | 118.2        | 118.5 |
| $q(n\text{Fe}_3\text{O}_4@\text{TEPA-NIP})(\text{ug/g})$   | 54.1  | 54.1    | 52.1      | 42.1         | 39.1  |
| $\alpha$                                                   | 2.18  | 2.18    | 2.27      | 2.81         | 3.03  |
| $q(n\text{Fe}_3\text{O}_4@\text{TEPA-TeCP-MIP})$<br>(ug/g) | 88.1  | 98.1    | 98.5      | 120.2        | 66.5  |
| $q(n\text{Fe}_3\text{O}_4@\text{TEPA-NIP})(\text{ug/g})$   | 54.1  | 54.1    | 52.1      | 42.1         | 39.1  |
| $\alpha$                                                   | 1.63  | 1.81    | 1.89      | 2.86         | 1.70  |
| $q(n\text{Fe}_3\text{O}_4@\text{TEPA-TCP-MIP})$<br>(ug/g)  | 87.8  | 95.6    | 117.5     | 80.2         | 68.5  |
| $q(n\text{Fe}_3\text{O}_4@\text{TEPA-NIP})(\text{ug/g})$   | 54.1  | 54.1    | 52.1      | 42.1         | 39.1  |
| $\alpha$                                                   | 1.62  | 1.77    | 2.26      | 1.90         | 1.75  |
| $q(n\text{Fe}_3\text{O}_4@\text{TEPA-DCP-MIP})$<br>(ug/g)  | 89.8  | 116.8   | 97.5      | 81.4         | 67.3  |
| $q(n\text{Fe}_3\text{O}_4@\text{TEPA-NIP})(\text{ug/g})$   | 54.1  | 54.1    | 52.1      | 42.1         | 39.1  |
| $\alpha$                                                   | 1.66  | 2.16    | 1.87      | 1.93         | 1.72  |
| $q(n\text{Fe}_3\text{O}_4@\text{TEPA-CP-MIP})$<br>(ug/g)   | 119.8 | 86.5    | 87.4      | 75.1         | 65.6  |
| $q(n\text{Fe}_3\text{O}_4@\text{TEPA-NIP})(\text{ug/g})$   | 54.1  | 54.1    | 52.1      | 42.1         | 39.1  |
| $\alpha$                                                   | 2.21  | 1.60    | 1.68      | 1.78         | 1.68  |
| $q(n\text{Fe}_3\text{O}_4@\text{TETA-PCP-MIP})$<br>(ug/g)  | 98.2  | 98.5    | 78.5      | 78.6         | 68.4  |
| $q(n\text{Fe}_3\text{O}_4@\text{TETA-NIP})(\text{ug/g})$   | 50.1  | 50.2    | 50.3      | 47.2         | 38.5  |
| $\alpha$                                                   | 1.96  | 1.96    | 1.56      | 1.67         | 1.78  |
| $q(n\text{Fe}_3\text{O}_4@\text{DETA-PCP-MIP})$<br>(ug/g)  | 96.8  | 96.5    | 82.4      | 75.9         | 65.4  |
| $q(n\text{Fe}_3\text{O}_4@\text{DEPA-NIP})$<br>(ug/g)      | 47.3  | 48.2    | 46.8      | 42.3         | 37.8  |
| $\alpha$                                                   | 2.05  | 2.00    | 1.76      | 1.79         | 1.73  |
| $q(n\text{Fe}_3\text{O}_4@\text{EDA-PCP-MIP})$<br>(ug/g)   | 95.2  | 93.6    | 81.6      | 74.6         | 64.2  |
| $q(n\text{Fe}_3\text{O}_4@\text{EDA-NIP})(\text{ug/g})$    | 45.4  | 46.4    | 45.5      | 42.5         | 37.6  |
| $\alpha$                                                   | 2.10  | 2.02    | 1.79      | 1.76         | 1.71  |
